# Supplementary material for: Salvianolic Acid B in Microemulsion Formulation Provided Sufficient Hydration for Dry Skin and Ameliorated the Severity of Imiquimod-induced Psoriasis-like Dermatitis in Mice
Source: MDPI journal article supplement (doi:10.3390/pharmaceutics12050457), 2020-05-17
Supplement: s1 [file s1]

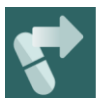

# Supplementary Materials: Salvianolic Acid B in Microemulsion Formulation Provided Sufficient Hydration for Dry Skin and Ameliorated the Severity of Imiquimod-induced Psoriasis-like Dermatitis in Mice

Jiun-Wen Guo, Yu-Pin Cheng, Chih-Yi Liu, Haw-Yueh Thong, Chi-Jung Huang, Yang Lo, Chen-Yu Wu and Shiou-Hwa Jee

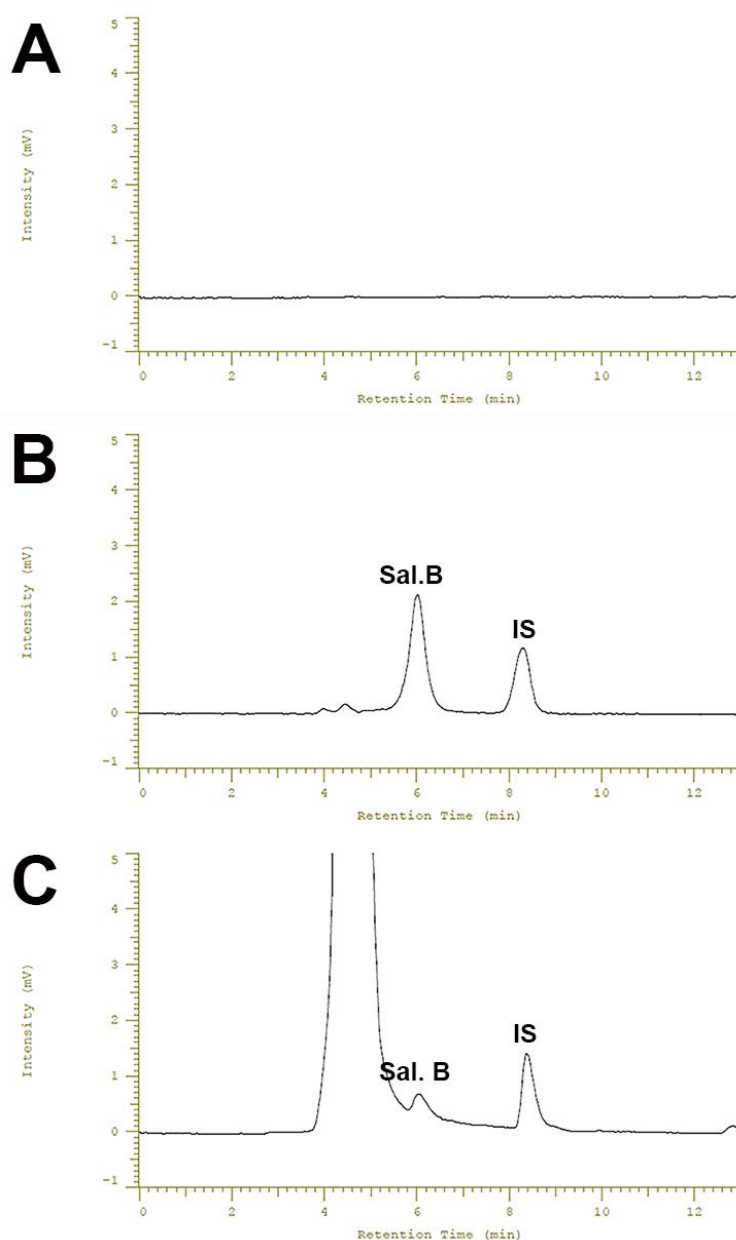

**Figure S1.** Representative high-performance liquid chromatography of Sal. B and chloramphenicol. (A) blank (B) standard with Sal. B (1  $\mu\text{g/mL}$ ) and internal standard (chloramphenicol) (C) receiver concentration at 1 h after a 200  $\mu\text{L}$  of Sal. B (300  $\mu\text{g/mL}$ ) was added to the donor cell. The retention time of Sal. B and chloramphenicol (IS) was  $6.0 \pm 0.1$  min and  $8.3 \pm 0.1$  min, respectively. Sal. B, Salvianolic acid B; IS, internal standard.

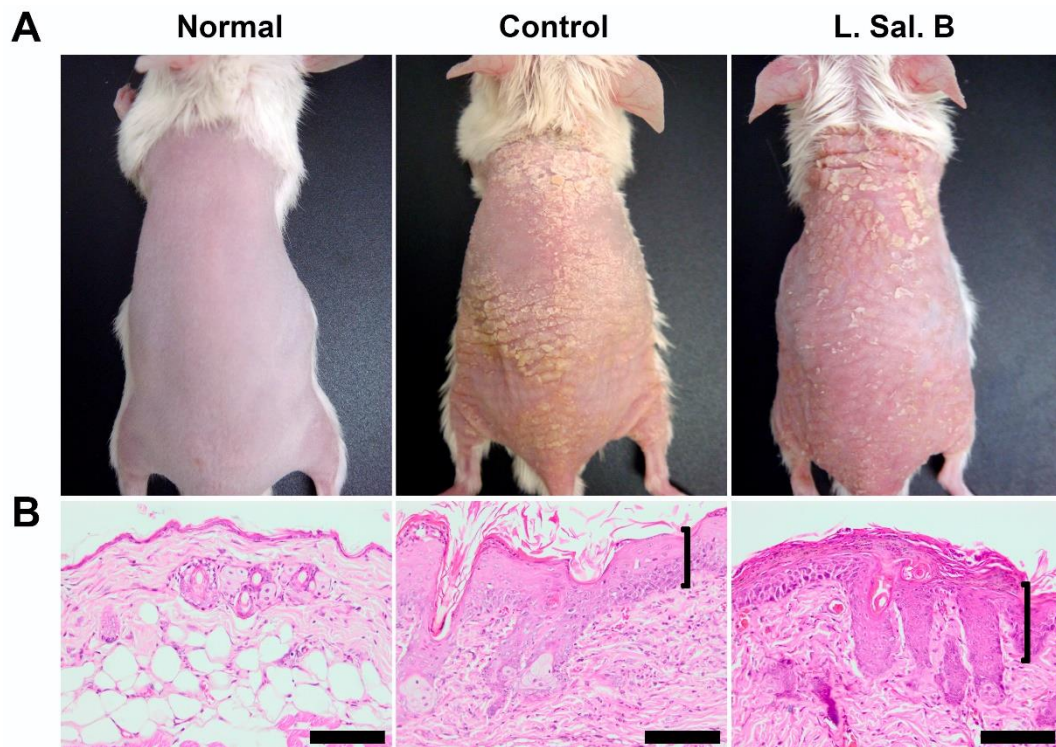

**Figure S2.** Low dose of Sal. B/formulation A did not improve psoriasis-like dermatitis. The low dosage of Sal. B (100  $\mu\text{g/mL}$ ) in formulation A treatment group showed no significant difference in clinical and pathological features of severity index compare to the control group. Therefore, the 300  $\mu\text{g/mL}$  Sal. B in formulation A was chosen as the optimal dose for further study. Scale bar = 100  $\mu\text{m}$ . Brackets indicate thickness of epidermis.
